# Supplementary material for: Influences of Ni Content on the Microstructural and Catalytic Properties of Perovskite LaNixCr1−xO3 for Dry Reforming of Methane
Source: MDPI journal article supplement (doi:10.3390/catal12101143), 2022-09-29
Supplement: s1 [file s1]

# **Influences of Ni Content on the Microstructural and Catalytic Properties of Perovskite $\text{LaNi}_x\text{Cr}_{1-x}\text{O}_3$**

Tingting Zhao, Haoran Yu, Xuyingnan Tao, Feiyang Yu, Ming Li, Haiqian Wang\*

Hefei National Research Center for Physical Science at the Microscale, University of  
Science and Technology of China, 96 Jinzhai Road, Hefei, Anhui 230026, People's  
Republic of China

\*Email: hqwang@ustc.edu.cn

**Table S1.** Area ratio of  $O_{ads}/O_{lat}$  for fresh and used  $LaNi_xCr_{1-x}O_3$  samples in O 1s spectra.

| x in $LaNi_xCr_{1-x}O_3$ | Area ratio of $O_{ads}/O_{lat}$ for fresh samples | Area ratio $O_{ads}/O_{lat}$ for used samples |
|--------------------------|---------------------------------------------------|-----------------------------------------------|
| 0.1                      | 1.27                                              | 0.79                                          |
| 0.3                      | 1.79                                              | 1.28                                          |
| 0.5                      | 2.04                                              | 1.69                                          |

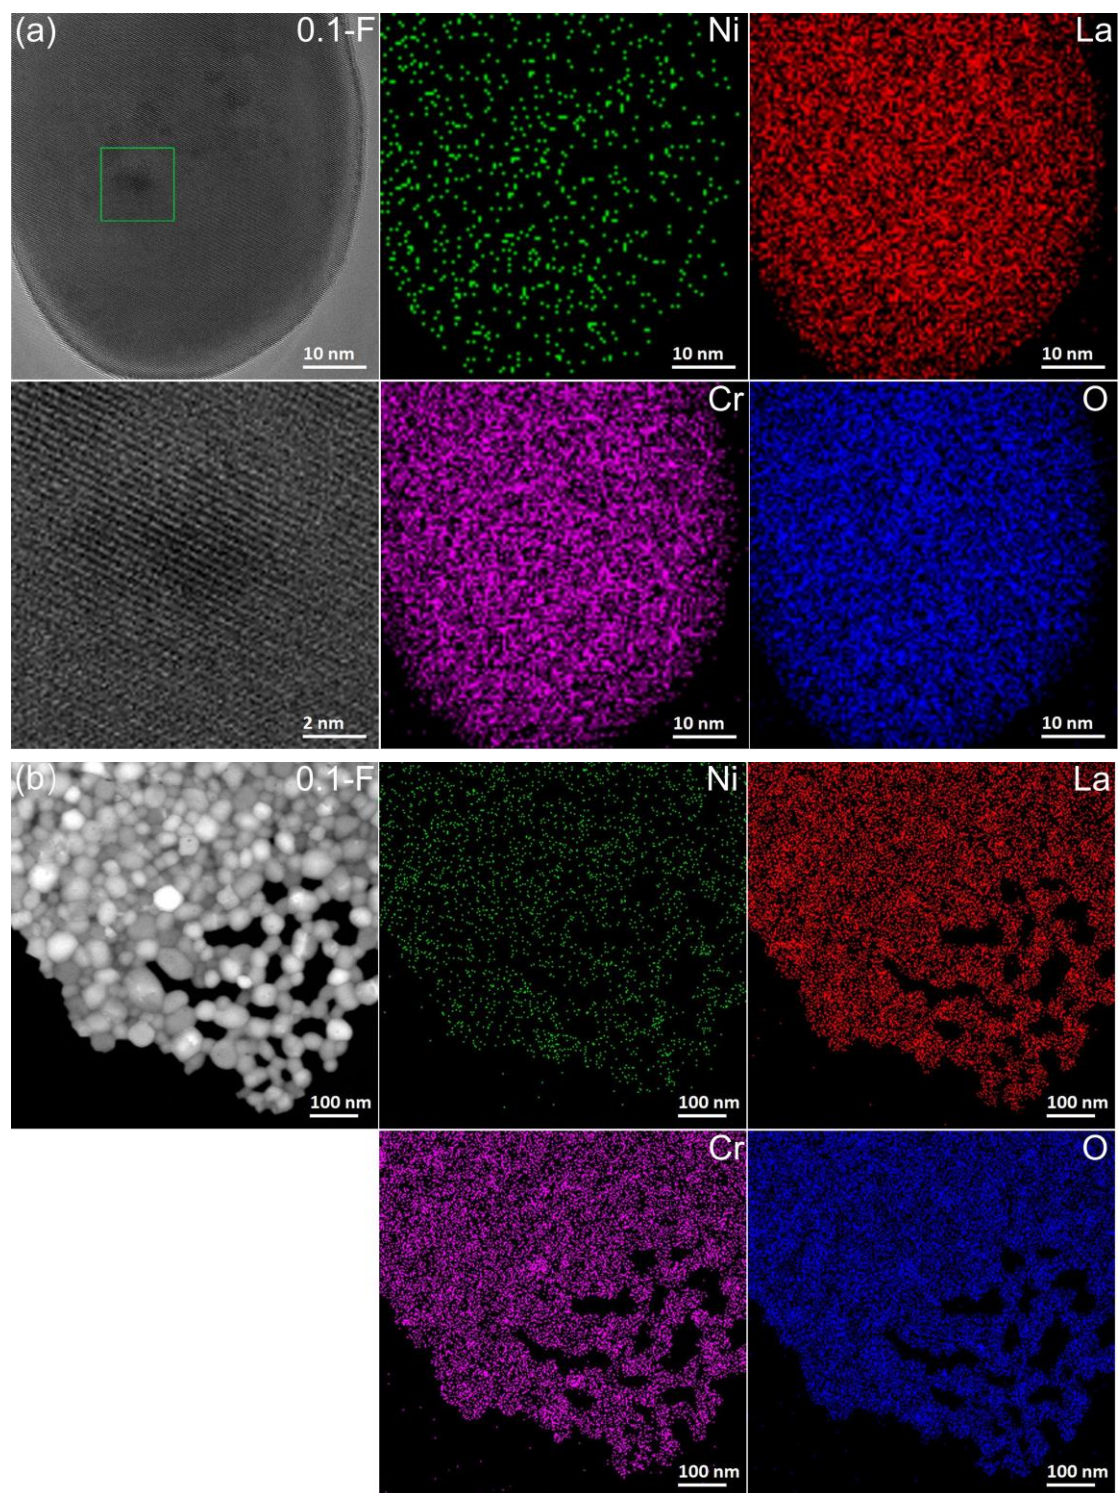

**Figure S1.** TEM images and EDS-Mapping of fresh  $\text{LaNi}_{0.1}\text{Cr}_{0.9}\text{O}_3$  sample. (a) high magnification images to show the lattice structure and element distribution. The selected area (marked by a green square) is also magnified to reveal details of the lattice. (b) low magnification images to show the element distribution in a larger area.



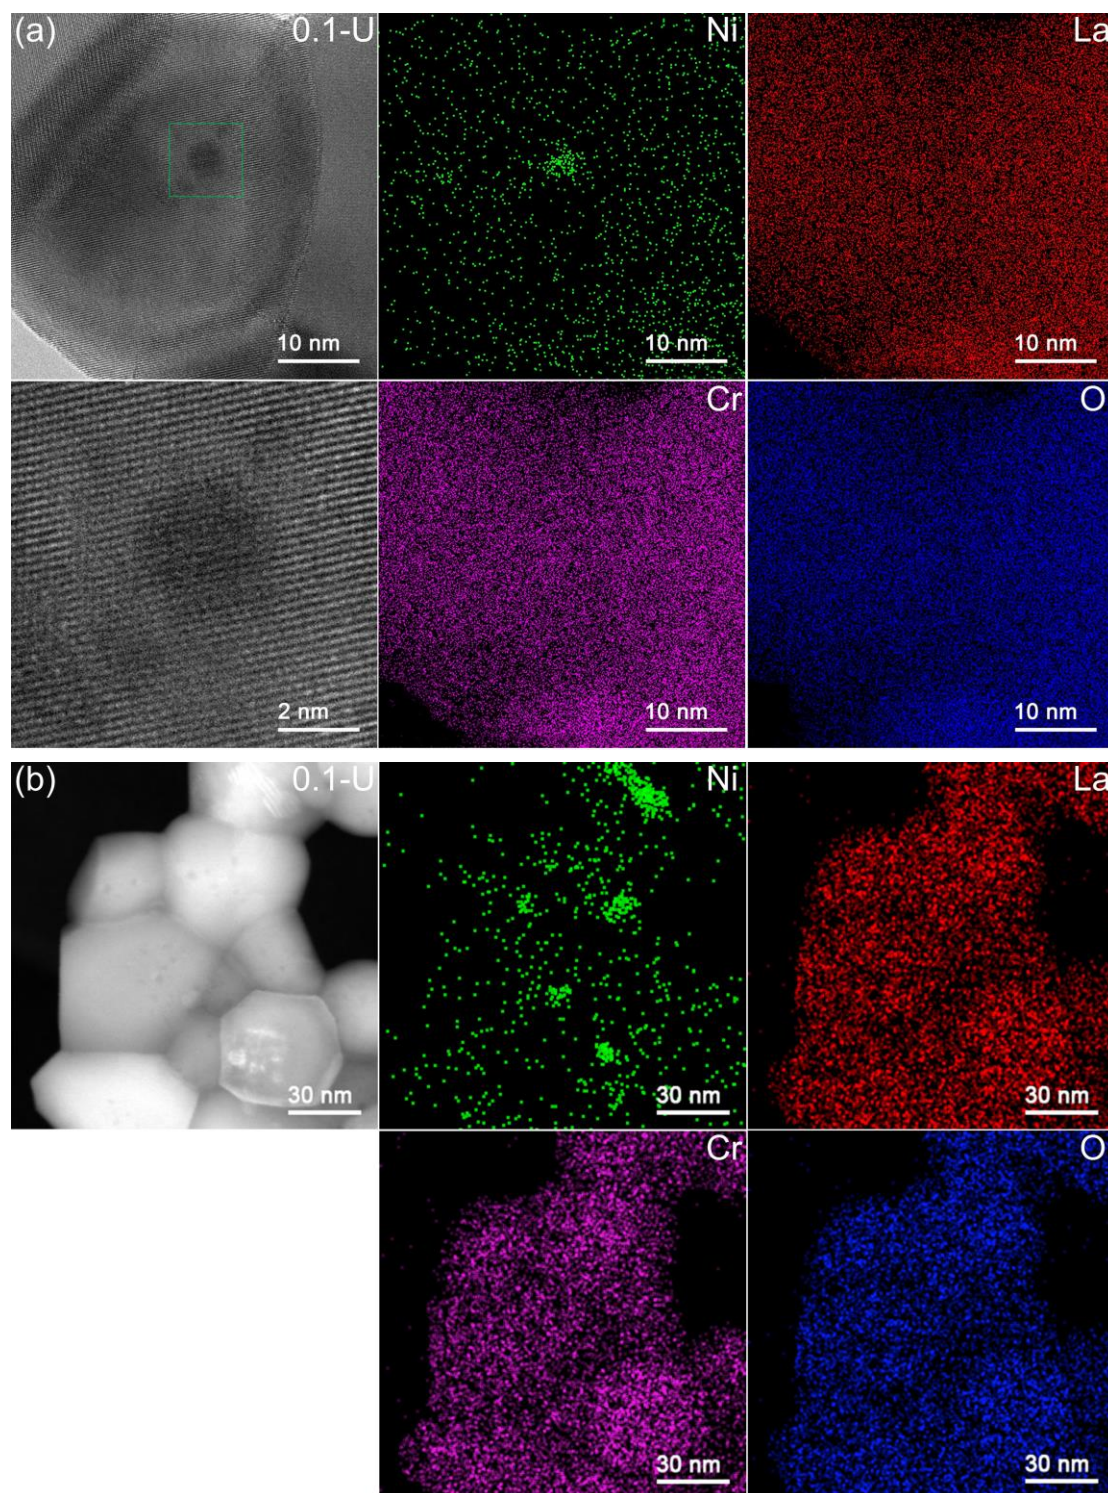

**Figure S2.** TEM images and EDS-Mapping of used  $\text{LaNi}_{0.1}\text{Cr}_{0.9}\text{O}_3$  sample. (a) high magnification images to show the lattice structure and element distribution. The selected area (marked by a green square) is also magnified to reveal details of the lattice. (b) low magnification images to show the element distribution in a larger area.



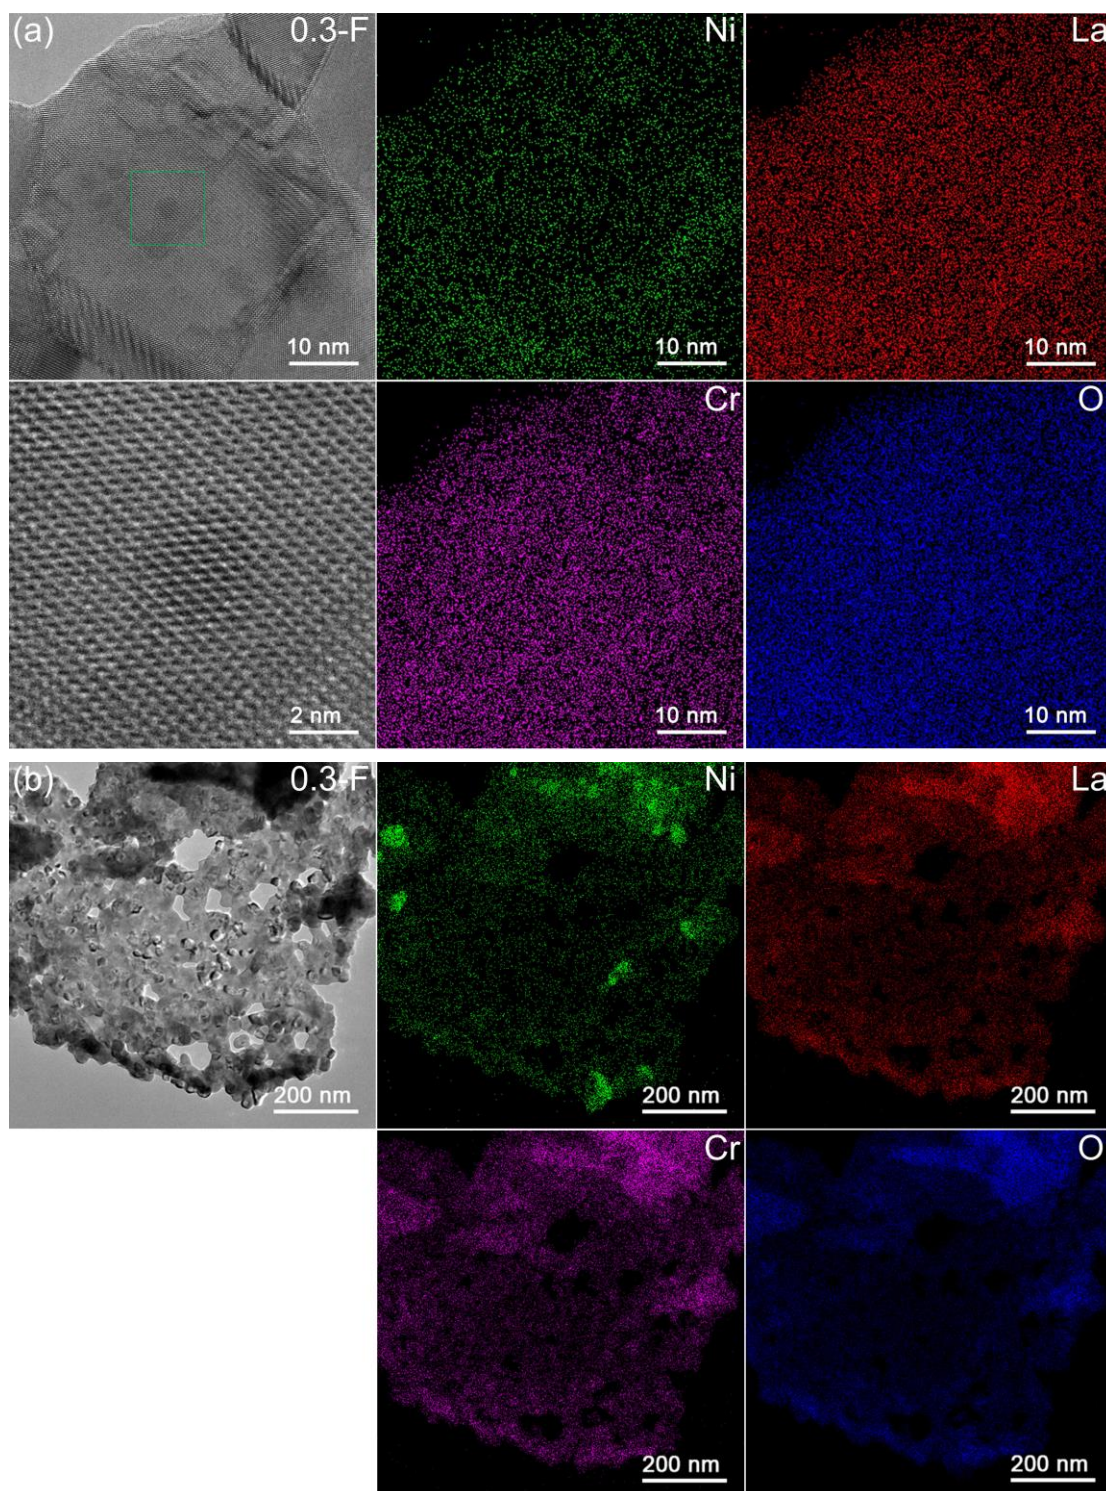

**Figure S3.** TEM images and EDS-Mapping of fresh  $\text{LaNi}_{0.3}\text{Cr}_{0.7}\text{O}_3$  sample. (a) high magnification images to show the lattice structure and element distribution. The selected area (marked by a green square) is also magnified to reveal details of the lattice. (b) low magnification images to show the element distribution in a larger area.



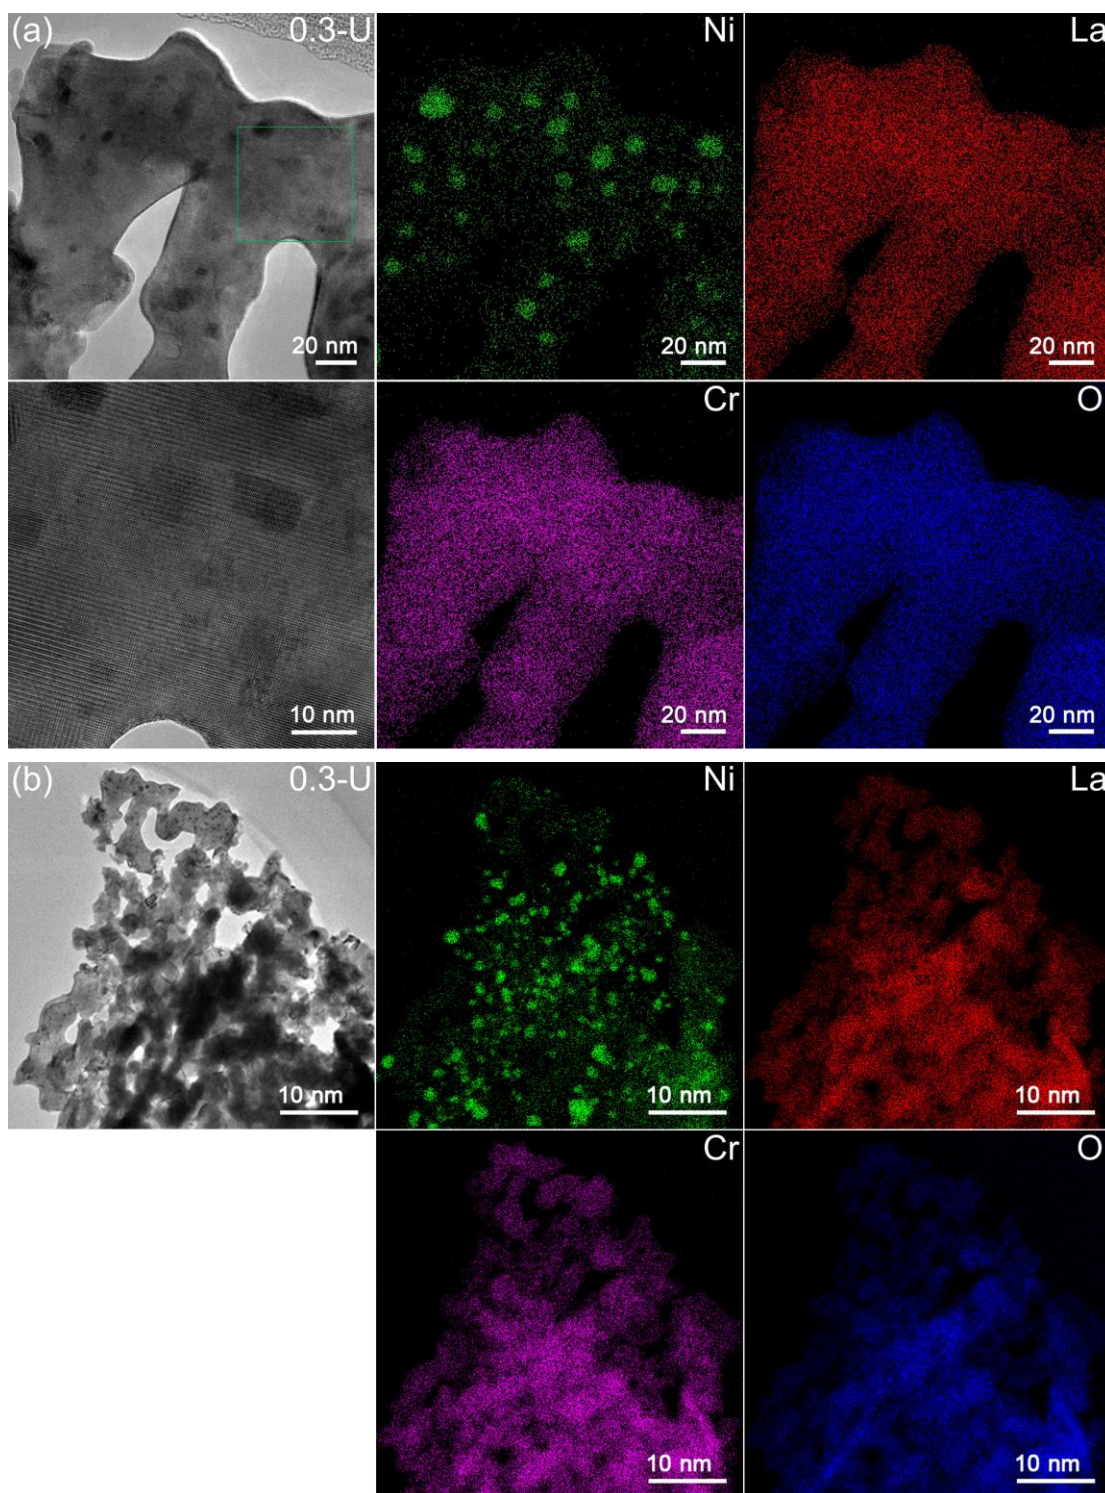

**Figure S4.** TEM images and EDS-Mapping of used  $\text{LaNi}_{0.3}\text{Cr}_{0.7}\text{O}_3$  sample. (a) high magnification images to show the lattice structure and element distribution. The selected area (marked by a green square) is also magnified to reveal details of the lattice. (b) low magnification images to show the element distribution in a larger area.

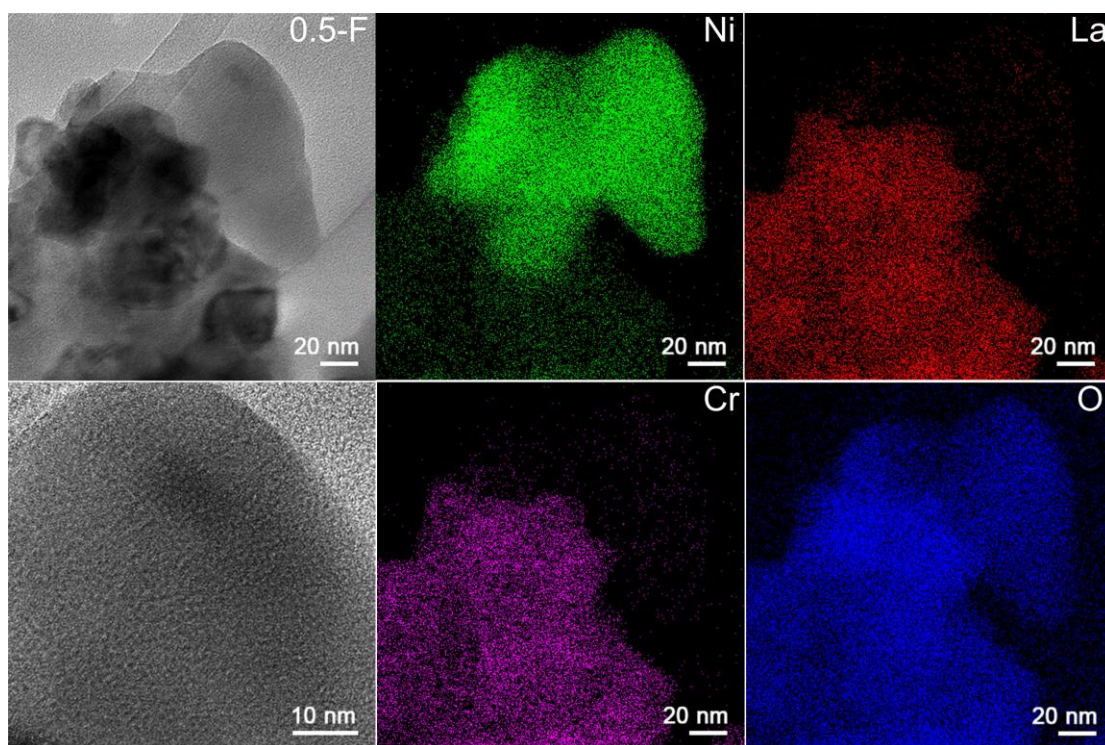

**Figure S5.** TEM images and EDS-Mapping of fresh  $\text{LaNi}_{0.5}\text{Cr}_{0.5}\text{O}_3$  sample.



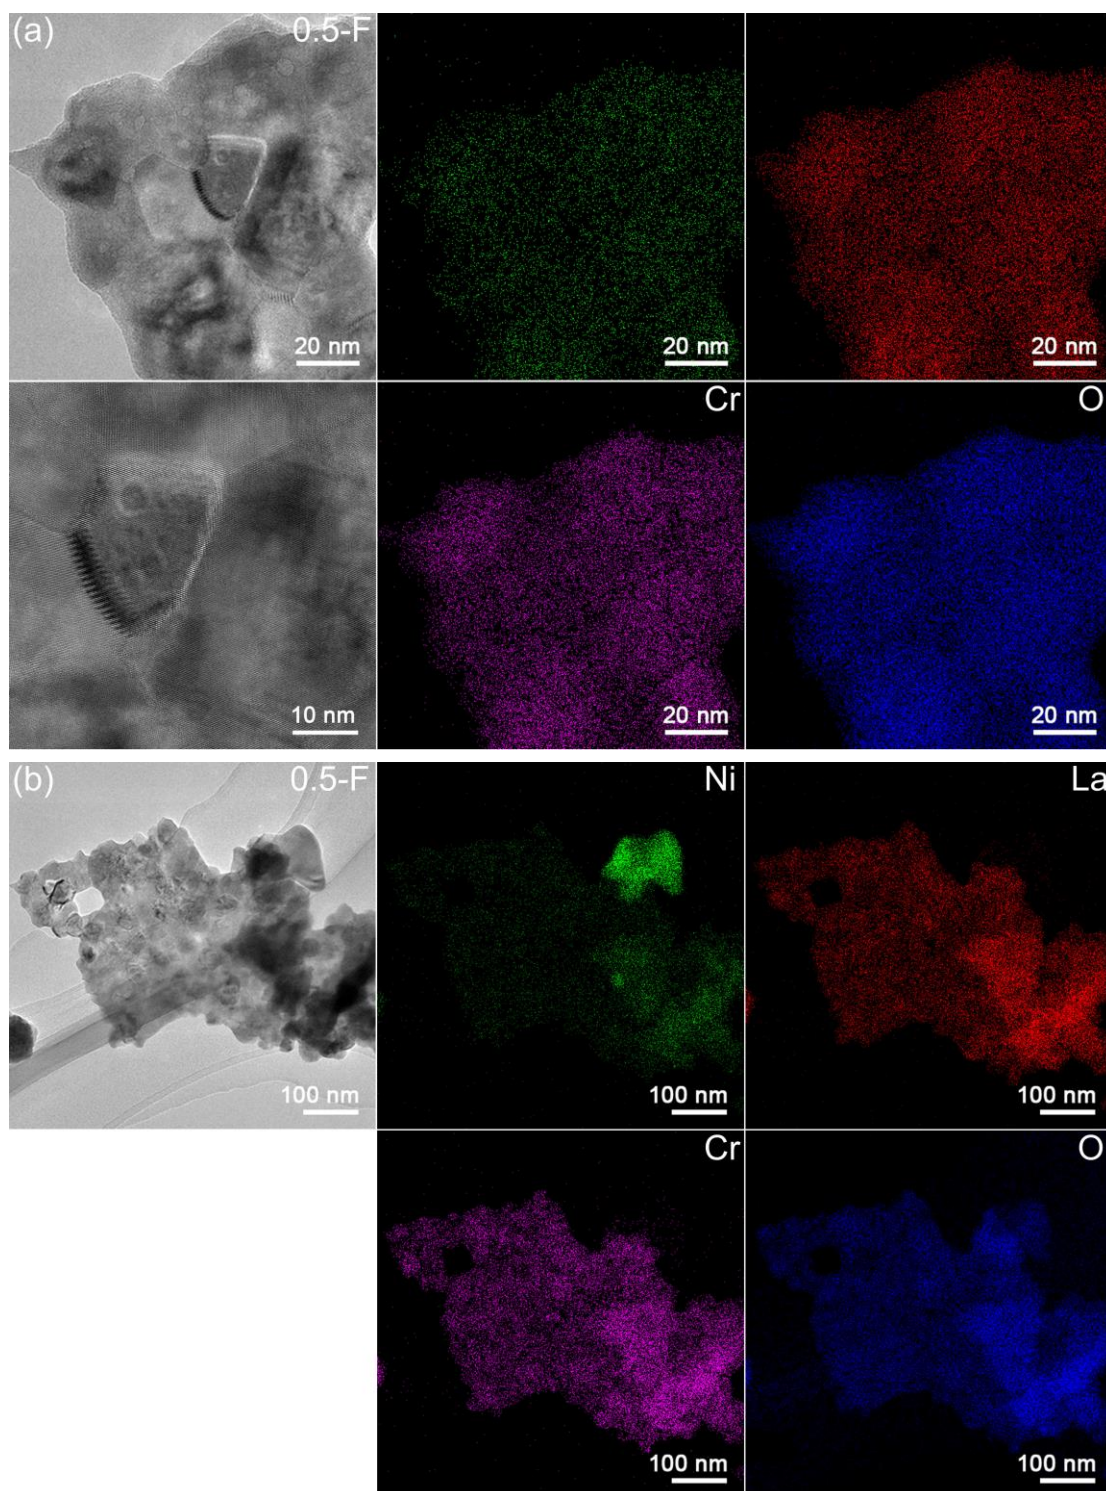

**Figure S6.** TEM images and EDS-Mapping of fresh  $\text{LaNi}_{0.5}\text{Cr}_{0.5}\text{O}_3$  sample. (a) high magnification images to show the lattice structure and element distribution. The selected area (marked by a green square) is also magnified to reveal details of the lattice. (b) low magnification images to show the element distribution in a larger area.



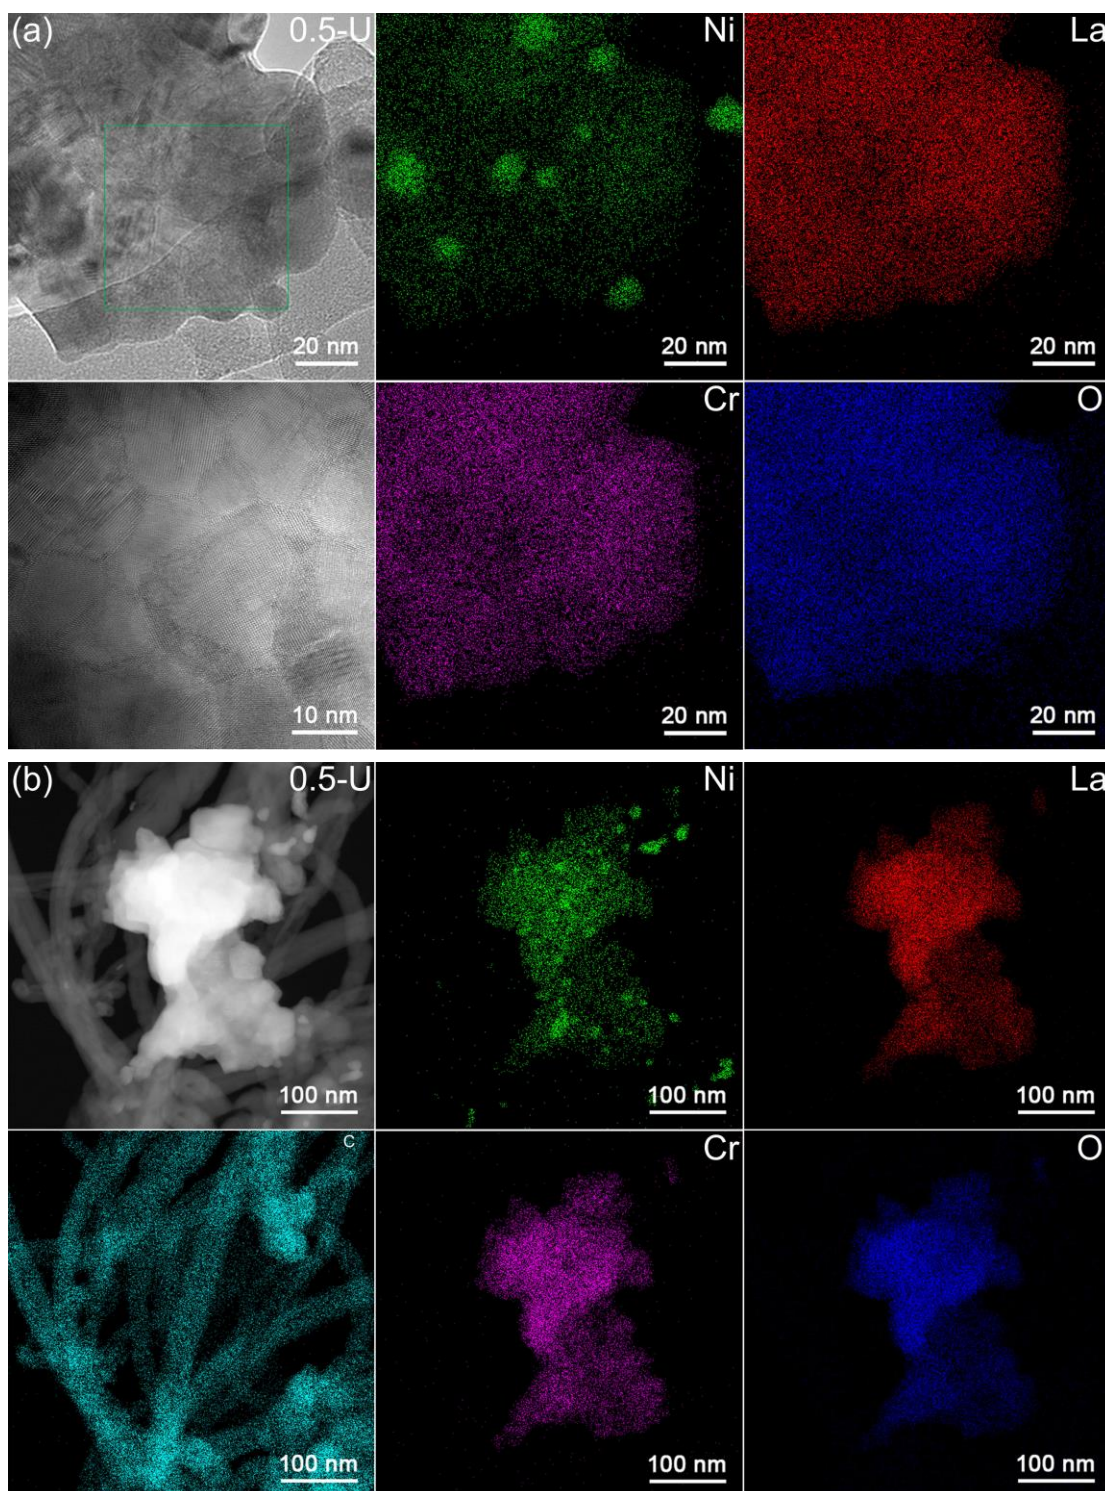

**Figure S7.** TEM images and EDS-Mapping of used  $\text{LaNi}_{0.5}\text{Cr}_{0.5}\text{O}_3$  sample. (a) high magnification images to show the lattice structure and element distribution. The selected area (marked by a green square) is also magnified to reveal details of the lattice. (b) low magnification images to show the element distribution in a larger area.

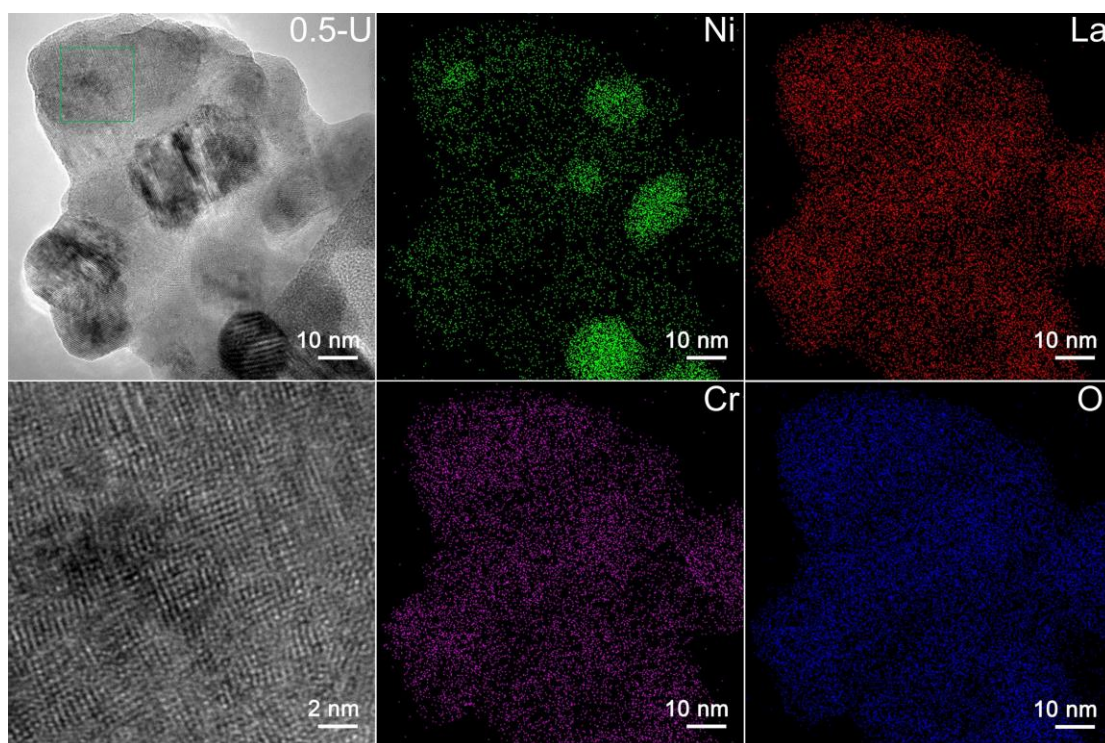

**Figure S8.** TEM images and EDS-Mapping of used  $\text{LaNi}_{0.5}\text{Cr}_{0.5}\text{O}_3$  sample. The selected area (marked by green square) is also magnified to reveal details of the lattice.
